# Application and Evaluation of Flipped Teaching Based on Video Conference in Standardized Training for Internal Medicine Residents

Xiao-Yu Zhang<sup>1,2,3,\*</sup>

1 Section of Education, Shanghai Public Health Clinical Center, Fudan University, Shanghai, 201508, P. R. China.

2 Department of Liver Disease, Shanghai Public Health Clinical Center, Fudan University, Shanghai, 201508, P. R. China.

3 Public Health Education Professional Committee, Shanghai Preventive Medicine Association, Shanghai, P.R. China.

## \*Correspondence:

Xiao-Yu Zhang , Shanghai Public Health Clinical Center, Fudan University, No.2901 Caolang Road, Shanghai, 201508, P. R. China.

Tel: +8613052251333.

Email: [zhangxiaoyuPRC@163.com](mailto:zhangxiaoyuPRC@163.com).

## Abstract

**Background:** Infectious disease training was a necessary part of standardized training for internal medicine residents, and a designated hospital by the health administration department provided infectious diseases training for residents in those hospitals that did not meet the training standards for infectious diseases in the region. However, due to holidays, coordination of training dates among hospitals, and vacation of other reasons, the actual training time in the Department of Infectious Diseases might be insufficient.

**Objective:** I aimed to explore Flipped Teaching with Video Conference as the carrier in infectious disease training for internal medicine residents, to make up for the lack of actual training time of the Department of Infectious Diseases for those residents caused by vacation, and to ensure the smooth implementation and quality assurance of infectious disease training for those residents.

**Methods:** Vertical management mode was adopted, management team and lecturer team were established, and training program and teaching implementation were formulated. Flipped Teaching based on Video Conference was carried out for internal medicine residents of dispatched hospitals who planned to participate in infectious diseases training of the designated hospital in April. The quantitative analysis was applied to this teaching evaluation, and the evaluation indexes were included into statistical analysis to evaluate the effect of the teaching model.

37 **Results:** All 19-member internal medicine residents participated in the Flipped  
38 Teach based on Video Conference from April 1 to 4, of which 12 residents were  
39 scheduled to participate in infectious diseases training from March 1 to April 30,  
40 and 7 residents were scheduled to participate in infectious diseases training from  
41 April 1 to May 31. A management team of 6 internal medicine residents was built,  
42 and a group of 12 lecturers were composed of 12 those residents who were  
43 scheduled to receive infectious diseases training in the designated hospital from  
44 March 1 to April 30. According to the requirements of training diseases in the  
45 Department of Infectious Diseases, 12 training contents were selected to carry out  
46 teaching, and the implementation rate of teaching plan was over 90%. A total of  
47 197 feedback questionnaires were collected. The feedback that the teaching  
48 quality was "good" and "very good" accounted for more than 96%, and the  
49 attendance rate of the whole teaching process reached more than 94%. About this  
50 teaching, 6 internal medicine residents put forward 18 suggestions  
51 of "Improvement suggestions", accounting for 9.1%; and 11 internal medicine  
52 residents gave 110 suggestions of "Praise highlights", accounting for 55.8%. The  
53 overall evaluation feedback of flipped teaching was good,  $P < 0.001$ .

54 **Conclusion:** Flipped Teach based on Video Conference was generally effective in  
55 carrying out for internal medicine residents participating in the infectious diseases  
56 training, and it could be used as a supplementary training method for  
57 standardized training of internal medicine residents to make up for the shortage of  
58 actual training period in a certain stage.

59 **[Key words]** Flipped teaching; Resident physician in internal medicine;  
60 Standardized training; Medical teaching

## 61 **Introduction**

62 In view of the rapid evolution of infectious diseases spectrum in Shanghai in recent  
63 years and the need for effective response to public health emergencies, the  
64 Department of Infectious Diseases was decided to be included in the compulsory  
65 rotation subject of standardized training for internal medicine residents, so as to  
66 further improve the knowledge structure of internal medicine residents and meet  
67 the social demand for the diagnosis and treatment of infectious diseases. For the  
68 training hospitals that did not have a ward of the Department of Infectious  
69 Diseases, or the training hospitals that could not meet the diseases required for  
70 the training of the Department of Infectious Diseases, internal medicine residents  
71 of which should be arranged to take part in the infectious diseases training of the  
72 designated hospital by the health administration department.[1]

73 With the continuous promotion of the infectious diseases training for internal

74 medicine residents in Shanghai, more and more hospitals participated in the  
75 collaborative training of internal medicine residents in the designated hospital, and  
76 the number of internal medicine residents entering the infectious diseases training  
77 of the designated hospital gradually had been increasing. According to the  
78 requirements of the standardized training program for internal medicine residents,  
79 internal medicine residents attending the infectious diseases training in the  
80 designated hospital needed to carry out professional training for 1-2 months. In  
81 order to unify management and training, it was necessary to arrange a certain  
82 number of internal medicine residents to enter the designated hospital for  
83 infectious diseases training in an orderly manner every month, and make orderly  
84 connection so as to ensure the quality of training and rational use of public  
85 medical resources. During the operation of the project, the training cycle of  
86 internal medicine residents in the designated hospital for infectious diseases  
87 training might be insufficient, due to holidays or vacations, coordination of training  
88 dates between multiple hospitals, and other subjective and objective reasons.  
89 Therefore, I explored a new teaching mode to further improve the infectious  
90 diseases training for internal medicine residents.

91 In the Flip Teaching research report, the flipped classroom approach in health  
92 professions education yielded a significant improvement in student learning  
93 compared with traditional teaching methods[3], the flipped classroom and lecture  
94 were essentially equivalent[4], and an increased perceived value and acceptability  
95 of this model was noted by the participants[5]. Therefore, I explored the use of  
96 Video Conference as the carrier to carry out Flipped Teaching, and constructed the  
97 teaching mode of "Flipped Teaching in Standardized Training for Internal Medicine  
98 Residents Based on Video Conference" to perform distance online teaching. The  
99 mode was applied to the infectious diseases training for internal medicine  
100 residents, and preliminary evaluation was conducted.

## 101 **Objects and Methods**

### 102 **Subjects**

103 The study objects were internal medicine residents who planned to take training in  
104 the designated hospital in April. And they were also those residents who had  
105 participated in the standardized training for residents in Shanghai. Their  
106 dispatched hospital had signed an "Agreement on Joint Training of Internal  
107 Medicine Residents" with the designated hospital. The informed consents of  
108 participants in internal medicine residents were obtained, including their data  
109 being used for the training and the research, and that this study was conducted in  
110 accordance with the Declaration of Helsinki.

## 111 **Construction of Flipping Teaching Mode with Video Conference as the Carrier**

112 The Flipped Teaching with Video Conference as the carrier adopted "vertical  
113 management mode" for management[2], and management team and lecturer  
114 team were established. According to the training requirements of the Department  
115 of Infectious Diseases in the Standardized Training Content and Standard for  
116 Resident Physicians (2021 Edition) -- Internal Medicine Training Rules, the  
117 management team would formulate the training program, and the lecturer team  
118 would select the training content and carry out teaching activities according to the  
119 plan. The following was the implementation of the teaching plan and the  
120 evaluation of the teaching work. The whole teaching organization, teaching  
121 implementation, discussion after teaching, teaching management and teaching  
122 evaluation were carried out online without restriction of physical space.

## 123 **Evaluation Indexes and Criteria**

124 This teaching model was evaluated from four aspects, including the  
125 implementation of the teaching plan, the attendance of the Flipped Teaching, the  
126 evaluation of teaching quality, and the overall evaluation of teaching.

127 Six teaching plan indicators (teaching on the planned time, teaching on the  
128 planned content, making PPT fully, providing references, unifying the teaching  
129 content and training program, and participating in after-class discussion) were  
130 established to evaluate the implementation of the teaching plan. Three attendance  
131 indicators (online on time, middle roll call and end on time) were established to  
132 evaluate the online attendance of the Flipped Teaching were completed. Nine  
133 teaching quality indicators (rigorous teaching attitude, punctual class, detailed and  
134 accurate teaching content, reasonable structure and clear process, highlighting  
135 teaching key points, clear teaching difficulties, accurate and refined language,  
136 combining theory with clinical practice, improving ability to analyze and deal with  
137 the disease) were established to evaluate the teaching quality. The overall  
138 evaluation of teaching adopted open questionnaire to evaluate each teaching  
139 without limit.

140 The teaching plan indicators and the attendance indicators were completed by  
141 the organizer, and the teaching quality indicators and the overall evaluation  
142 content were completed by every trainee for each teaching session. Among them,  
143 teaching plan indicators and teaching quality indicators were objective indicators,  
144 and they were derived from Teaching Evaluation Table of Standardized Residency  
145 Training; while overall evaluation indicators was subjective. The feedback of the  
146 over evaluation from open questionnaire was firstly classified according to the

147 evaluation content. The details of classification as follow: If the content of a  
148 questionnaire feedback was pointing out deficiencies or needing improvement of  
149 one teaching session, this feedback was classified as "Improvement suggestions"; If  
150 all the content of a questionnaire feedback was praising highlights or learning  
151 achievements of one teaching session, this feedback was classified as "Praise  
152 highlights"; If the content of a questionnaire feedback was no special suggestions  
153 of one teaching session, this feedback was classified as "No special suggestions".

## 154 **Software Application and Statistical Analysis**

155 Video Conference adopted Tencent Conference software to carry out the Flipped  
156 Teaching, including: teaching organization, teaching implementation, discussion  
157 after teaching, teaching management, and teaching evaluation.

158 The Questionnaire Star software was used to develop teaching quality indicators  
159 and overall evaluation indicators, and carry out star survey after class; and then the  
160 data of above indexes were downloaded from the software and incorporated into  
161 statistical analysis.

162 SPSS software version 23.0 (SPSS Inc. Chicago, IL, USA) was used for statistical  
163 analysis of the data. The data conforming to normal distribution were expressed as  
164 mean  $\pm$  standard deviation to reflect the distribution of the study indicators. The  
165 counting data was represented by example (%) to reflect the composition ratio of  
166 the study indicators. Pearson chi-square test was used for the counting data. A P  
167 value of two-sided less than 0.05 was considered as statistically significant.

## 168 **Results**

### 169 **Basic Information of Physicians Participating in Teaching Activities**

170 A total of 19 internal medicine residents participated in the Flipped Teaching  
171 program, all from tertiary hospitals. Among them, 9 were male, accounting for  
172 47.4%. The average age was 29.5 years. 5 had bachelor degree, accounting for  
173 26.3%; 4 had master degree, accounting for 21.1%; 10 had doctor degree,  
174 accounting for 52.6%. 17 internal medicine residents were qualified as practicing  
175 physicians, accounting for 89.5%. 2 in the first year of training, accounting for 10.5%.  
176 12 in the second year of training, accounting for 63.2%. 5 in the third year of  
177 training, accounting for 26.3%. 12 were scheduled to participate in infectious  
178 diseases training in the designated hospital from March 1 to April 30, accounting  
179 for 63.1%; 7 were scheduled to participate in infectious diseases training in the  
180 designated hospital from April 1 to May 31, accounting for 36.8%. The detailed  
181 information is shown in **Table 1**.

## 182 **Flipped Teaching Organization**

183 The Flipped Teaching with Video Conference as the carrier was organized and  
184 implemented by the contact person of the "Rotation Training of Infectious  
185 Diseases Department for Internal Medicine Residents" project, which was managed  
186 by the "vertical management mode". The management team was formed together  
187 with the monitor and group leader of this training course, and 12 lecturers were  
188 composed of those residents who were scheduled to take part in the infectious  
189 diseases training of the designated hospital from March 1 to April 30.

190 The contents of the lecture were as follows: Analysis of Chronic Hepatitis B,  
191 Study on Guidelines for Prevention and Treatment of Hepatitis C (2019 Edition),  
192 Identification and Treatment of Clostridium Difficile Associated Diarrhea, Bacterial  
193 Liver Abscess, Diagnosis and Treatment of Tuberculosis, Guidelines for the  
194 Diagnosis and Treatment of Syphilis, Diagnosis and Treatment of Tuberculous  
195 Meningitis, Infective Endocarditis, Cryptococcal Meningitis, Study on AIDS  
196 Diagnosis and Treatment Guide in China (2021 edition), Diagnosis and Treatment  
197 of Cirrhotic Ascites, and Diagnosis and Treatment of liver Failure. Teaching tasks  
198 were assigned to those residents according to the time period, and PPT was  
199 developed to carry out teaching activities according to clinical guidelines. The  
200 contents of the lecture are shown in **Table 2**.

## 201 **Evaluation of Teaching Plan Implementation**

202 The Flipped Teaching was carried out according to plan, with real-time online  
203 management and evaluation. In the teaching process, one of the lecturers delayed  
204 the start time of teaching on the planned time, because he was not familiar with  
205 Video Conferencing software; and the rest of the lecturers carried out teaching  
206 activities on time. Teaching plan met the requirements for 11 times, accounting for  
207 91.7%. All the other teaching plan indicators were in compliance with the  
208 compliance rate of 100%. The detailed information is shown in **Table 3**.

## 209 **Teaching Attendance and Feedback**

210 The whole process of attendance was checked for this Flipped Teaching based on  
211 Video Conference, and the three time nodes of "online on time", "middle roll call"  
212 and "end on time" were included in the statistics. There were 18, 18 and 19 internal  
213 medicine residents in attendance at the above three time nodes, and the  
214 attendance rates were 94.7%, 94.7% and 100% respectively. One of those residents  
215 failed to go online on time because he was not familiar with Video Conference  
216 software, and one asked for leave and went offline due to an emergency. The  
217 detailed attendance is shown in **Table 4**.

## 218 **Quality Evaluation of Teaching**

219 The teaching quality of the Flipped Teaching based on Video Conference was  
220 investigated from the questionnaire star, and 179 effective feedback  
221 questionnaires were collected. Feedback "good" of nine indicators ("Rigorous  
222 teaching attitude", "Punctual class", "Detailed and accurate teaching content",  
223 "Reasonable structure and clear process", "Highlighting teaching key points",  
224 "Clear teaching difficulties", "Accurate and refined language", "Combining theory  
225 with clinical practice", and "Improving ability to analyze and deal with the disease")  
226 was 26, 29, 36, 33, 32, 33, 31, 28 and 30, accounting for 13.2%, 14.7%, 18.3%, 16.8%,  
227 16.3%, 16.8%, 15.8%, 14.3% and 15.3%, respectively. And Feedback "very good" of the  
228 above nine indicators 170, 167, 157, 159, 162, 157, 161, 163 and 163, accounting  
229 for 86.3%, 84.8%, 79.7%, 80.7%, 82.2%, 79.7%, 81.7%, 82.7% and 82.7%, respectively.  
230 Overall, teaching quality was rated as "good" and "very good" by more than 96%.  
231 The detailed evaluation of teaching quality is shown in **Table 5**.

## 232 **Overall Evaluation of Teaching**

233 In the overall evaluation of the Flipped Teaching based on Video Conference, 6  
234 internal medicine residents filled in "Improvement suggestions" feedback in 18  
235 questionnaires, accounting for 9.1%; 11 internal medicine residents proposed  
236 "Praise highlights" feedback in 110 questionnaires, accounting for 55.8%. 10  
237 internal medicine residents had "No special suggestions" feedback in 69  
238 questionnaires, accounting for 35.0%. The overall evaluation feedback of Flipped  
239 Teaching based on Video Conference was good,  $P < 0.001$ . The detailed overall  
240 evaluation of feedback is shown in **Table 6**.

## 241 **Discussion**

242 The participation of internal medicine residents participating in the infectious  
243 diseases training was carried out under specific conditions, which was the  
244 perfection of the knowledge structure of the standardized training of internal  
245 medicine residents and the social needs for the diagnosis and treatment of  
246 infectious diseases. Those training hospitals that did not meet the training  
247 standards for infectious diseases should cooperate with the designated hospital to  
248 conduct infectious diseases training for internal medicine residents. Due to the fact  
249 that the internal medicine residents who participated in the infectious diseases  
250 training of the designated came from more than 10 hospitals in Shanghai, the  
251 personnel management, and implementation plan and training progress of  
252 internal medicine residents in each hospital were different to some extent. In order

253 to ensure the quality of internal medicine residents training and rationally allocate  
254 the training resources, a certain number of internal medicine residents were  
255 accepted to participate in the infectious diseases training of the designated  
256 hospital every month. In the actual operation, due to involve legal holidays,  
257 vocations for other reasons and emergencies; some of the internal medicine  
258 residents taking part in the infectious diseases training of the designated hospital  
259 could not meet the training time requirements. To this end, I applied Flipped  
260 Teaching based on Video Conference to carry out infectious diseases training for  
261 internal medicine residents. Therefore, it was obviously advanced and necessary to  
262 carry out the application and research of this teaching model.

263 Flipped classrooms showed many advantages when tested in a radiology  
264 classroom setting, making up for some inadequacies of didactic classrooms; but it  
265 was needed to make improvements to make it more suitable for the Chinese  
266 medical education mode.[6] The flipped classroom approach showed promise in  
267 ophthalmology clerkship teaching; but, it had some drawbacks; further evaluation  
268 and modifications were required before it could be widely accepted and  
269 implemented.[7] Based on the above, I carried out this teaching model research.  
270 The whole Flipped Teaching mode involved organizational structure, training  
271 content, training plan, training implementation, training management and  
272 evaluation. This teaching research was a prospective study, establishing  
273 organizational structure and management model, and developing training content  
274 and training plan. The implementation and quality analysis of the teaching model  
275 was evaluated by assessment and after-school questionnaire survey. Then the  
276 practicability, rationality, feasibility and effectiveness of this teaching model were  
277 evaluated. Therefore, this teaching research had distinct scientific nature.

278 The teaching organization structure included training organization,  
279 management mode, management team and lecturer team. This training was  
280 organized and implemented by the contact person of the "Rotation Training of  
281 Infectious Diseases Department for Internal Medicine Residents" project, to ensure  
282 the cooperation and support of teaching administrative departments and internal  
283 medicine residents of each hospital dispatched, and to mobilize the enthusiasm of  
284 internal medicine residents for this infectious diseases training project. A  
285 management team of six was set up in this teaching work, which were used to  
286 assist the project contact person to organize and implement this teaching activity,  
287 and supervised the teaching plan and supporting work, In order to further develop  
288 the those residents' subjective initiative. A total of 12 lecturers were organized,  
289 consisting of those residents who planned to attend training on the infectious  
290 diseases in the designated hospital from March 1 to April 30; As a result, they had



291 one month of clinical training experience in the Department of Infectious Diseases.  
292 They chose target diseases to give lectures based on their own clinical practice and  
293 shared their learning experience of this disease. In this way, the teaching could  
294 encourage the lecturers to learn and summarize the clinical knowledge of the  
295 selected diseases. 12 lecturers were selected in this teaching to encourage more  
296 qualified lecturers to participate in teaching activities and ensure the coverage of  
297 the teaching content. This teaching adopted vertical management mode. Since the  
298 "vertical management" mode had gained good experience and evaluation in the  
299 field of standardized training for public health physicians[2], this mode was  
300 adopted in this teaching organization, which also reflected that the teaching  
301 organization had very good practicability.

302 The content of this teaching was based on the establishment of the training  
303 program of training syllabus for internal medicine residents, with the orientation of  
304 the essential diseases and key diseases in the infectious diseases training. The goal  
305 of this teaching was to train the diagnosis and treatment skills of infectious  
306 diseases for internal medicine residents. The main contents were based on the  
307 clinical diagnosis and treatment guidelines of infectious diseases. All above was to  
308 ensure that the teaching purpose was consistent with requirements of the  
309 infectious diseases training, and the standardized training of internal medicine  
310 residents. So, 12 diseases were selected as the main topics of the teaching,  
311 covering all the diseases that must be mastered, and involving other key diseases  
312 of the infectious diseases training. Therefore, the teaching and training content  
313 was reasonably designed, which met the needs of the infectious diseases training  
314 at the level of internal medicine residents and reflected the rationality of the  
315 teaching mode.

316 In the part of planning implementation, it was an important part of teaching  
317 work to formulate training plans and organize implementation under the condition  
318 of definite training content. In order to carry out the teaching contents in an  
319 orderly manner, targeted teaching plans were drawn up, and the teaching  
320 contents needed to be implemented for specific personnel and specific time  
321 periods, so that the lecturers and participating residents could make full  
322 preparations. The management group made a good teaching time frame; while  
323 and the lecturers took the initiative to participate, and selected their own lecturing  
324 content and lecturing time. Once the content of the lecture was determined, no  
325 modification would be made unless in an emergency situation. If the teaching  
326 could not be carried out within the planned time, the lecturer's teaching should be  
327 adjusted to the last time period in an orderly manner. The original plan of the 12  
328 disease teaching tasks was to be completed in 4 days, and three time periods were

329 arranged for orderly teaching activities every afternoon. In the implementation of  
330 the teaching plan, it was adopted for unified planning, group management,  
331 classified hosting, punctual teaching, online discussion, whole attendance, and  
332 "Questionnaire Star" survey feedback after class. In this teaching activity, one of the  
333 lecturers delayed the start time of teaching, because he was not familiar with Video  
334 Conference software. Therefore, in the formal organization of teaching activities,  
335 teaching preparation should be done more carefully for every section. For example,  
336 software drills and trial lectures should be carried out in the early stage of teaching.  
337 In the process of teaching implementation, the proportion of "Teaching on the  
338 planned time" was 91.7%, and the proportion of "Teaching on the planned content",  
339 "PPT making fully", "Providing references", "Unifying teaching content and training  
340 outline" and "Participation in after-class questions" was 100%. From the perspective  
341 of teaching arrangement and implementation, this teaching plan had been  
342 implemented smoothly and has strong feasibility.

343 This Flipped Teaching based on Video Conference adopted online  
344 whole-process monitoring, and three time nodes of "On-time online", "Middle roll  
345 Call" and "On-time end" were included in the statistics. The attendance rate was  
346 94.7%, 94.7% and 100% respectively. One of them failed to go online on time  
347 because he was not familiar with the Video Conference software, and one of them  
348 asked for leave and went offline because of emergency during the process. From  
349 the statistics of the above three time nodes, whole-process monitoring was helpful  
350 to stabilize the teaching attendance rate. It was also conducive to mastering the  
351 teaching of emergency, timely discovery, timely treatment. From the perspective of  
352 teaching management experience, online questioning could motivate the lecturers  
353 to prepare for teaching, promote the lecturers to take the initiative to learn for  
354 knowledge reserve, and mobilize the active learning consciousness and  
355 enthusiasm of those residents. And the attendance of this teaching model was  
356 higher than that of other types of flipped classes, where attendance was 30-80%[8].  
357 Through the Questionnaire Star to the teaching quality of 9 indicators feedback,  
358 the results showed that the teaching quality was "Good" and "Very good"  
359 accounting for more than 96%. In other specialized clinical training, flipped  
360 classroom was also well received and preferred, and it improved teaching  
361 satisfaction.[9-11] In terms of the attendance and teaching quality evaluation of  
362 internal medicine residents, the effectiveness of this teaching model was relatively  
363 good.

364 In the overall evaluation of this teaching, 11 internal medicine residents raised  
365 "Praise highlights" in 110 questionnaires, accounting for 55.8%; which was higher  
366 than other feedback,  $P < 0.05$ . It reflected that the Flipped Teaching based on Video

367 Conference was generally recognized, the opinion which was consistent with other  
368 clinical training studies that a flipped classroom approach in physiotherapy  
369 education resulted in improved student performances in this professional  
370 programme[12], even a study suggested flipped classroom for cardiovascular  
371 prevention curriculum showed greater effectiveness in knowledge gain[13].  
372 However, 10 internal medicine residents had “No special suggestions” feedback  
373 among the 69 questionnaires; and 6 internal medicine residents filled in  
374 “Improvement suggestions” feedback in 18 questionnaires, accounting for 9.1%.  
375 The above feedback also suggested that the teaching mode still needed to be  
376 improved. In promoting the application of this mode, the organizer also needed to  
377 follow up the training work in real time, collected the feedback of those residents,  
378 and made continuous improvement based on the requirements of infectious  
379 diseases knowledge in the standardized training for internal medicine residents.

## 380 **Conclusions and Perspectives**

381 The Flipped Teaching with Video Conference as carrier for internal medicine  
382 residents participating in the infectious diseases training was generally effective.  
383 The degree of participation and recognition of those residents in this Flipped  
384 Teaching was relatively good, and the implementation of teaching program was  
385 feasible. Application of this teaching mode could make up for the shortage of  
386 actual training time of residents in a certain stage.

## 387 **Ethical Approval and Consent to Participate**

388 Informed consents of participants in the standardized training for internal  
389 medicine residents were obtained for the training and the study. The study  
390 received Institutional Review Board (IRB) approval by the Shanghai Public Health  
391 Clinical Center Ethics Committee. The IRB number was No. 2021-S026-01.

## 392 **Acknowledgments**

393 This study was supported by the internal medicine residents who had participated  
394 in the standardized training for residents in Shanghai. Thanks to the teaching  
395 administration department and the resident standardized training base of the  
396 united training hospital for their support. Thanks for the support of Shanghai and  
397 National administration departments of standardized training for resident  
398 physicians.

## 399 **Authors' Contributions**

400 Xiao-Yu Zhang made conception, design, acquisition of data, analysis and  
401 interpretation of data, drafted and revised the manuscript, and agreed to be  
402 accountable for all aspects of the work.

### 403 **Funding**

404 The author received no specific funding for this work.

### 405 **Disclosure**

406 The author has declared that no competing interests exist.

### 407 **Consent for Publication**

408 The author has read and agreed to the published version of the manuscript.

### 409 **Data Availability Statement**

410 The data included in the manuscript submitted to the journal is transparent, and all  
411 relevant data is available within the tables in the publication.

### 412 **References**

- 413 [1] Shanghai health and family planning commission, Notice on strengthening  
414 standardized training of residents in Shanghai for rotation training of infection  
415 department of internal medicine residents.  
416 <http://wsjkw.sh.gov.cn/kjy2/20180815/0012-57913.html>  
417 [2] Zhang XY. Rapid Clinical Promotion Model of Standardized Training for Public  
418 Health Physicians in China. *Adv Med Educ Pract.* 2021;12:463-471.  
419 [doi:10.2147/AMEP.S306737](https://doi.org/10.2147/AMEP.S306737)  
420 [3] Hew KF, Lo CK. Flipped classroom improves student learning in health  
421 professions education: a meta-analysis. *BMC Med Educ.* 2018;18(1):38.  
422 [doi:10.1186/s12909-018-1144-z](https://doi.org/10.1186/s12909-018-1144-z)  
423 [4] Riddell J, Jhun P, Fung CC, et al. Does the Flipped Classroom Improve Learning  
424 in Graduate Medical Education?. *J Grad Med Educ.* 2017;9(4):491-496.  
425 [doi:10.4300/JGME-D-16-00817.1](https://doi.org/10.4300/JGME-D-16-00817.1)  
426 [5] Afzal S, Masroor I. Flipped Classroom Model for Teaching Undergraduate  
427 Students in Radiology. *J Coll Physicians Surg Pak.* 2019;29(11):1083-1086.  
428 [doi:10.29271/jcpsp.2019.11.1083](https://doi.org/10.29271/jcpsp.2019.11.1083)  
429 [6] Wu S, Pan S, Ren Y, et al. Existing contradictions and suggestions: flipped  
430 classroom in radiology courses of musculoskeletal disease under Chinese medical  
431 educational mode from medical imaging student perspective. *BMC Med Educ.*

- 432 2020;20(1):75.  
433 [doi:10.1186/s12909-020-1991-2](https://doi.org/10.1186/s12909-020-1991-2)
- 434 [7] Tang F, Chen C, Zhu Y, et al. Comparison between flipped classroom and  
435 lecture-based classroom in ophthalmology clerkship. 2017;22(1):1406198. Med  
436 Educ Online. 2017;22(1):1395679.  
437 [doi:10.1080/10872981.2017.1395679](https://doi.org/10.1080/10872981.2017.1395679)
- 438 [8] Vogel L. Educators propose "flipping" medical training. CMAJ.  
439 2012;184(12):E625-E626.  
440 [doi:10.1503/cmaj.109-4212](https://doi.org/10.1503/cmaj.109-4212)
- 441 [9] Chick RC, Adams AM, Peace KM, et al. Using the Flipped Classroom Model in  
442 Surgical Education: Efficacy and Trainee Perception. J Surg Educ.  
443 2021;78(6):1803-1807. [doi:10.1016/j.jsurg.2021.05.008](https://doi.org/10.1016/j.jsurg.2021.05.008)
- 444 [10] Vanka A, Vanka S, Wali O. Flipped classroom in dental education: A scoping  
445 review. Eur J Dent Educ. 2020;24(2):213-226.  
446 [doi:10.1111/eje.12487](https://doi.org/10.1111/eje.12487)
- 447 [11] Lu RY, Yanovitch T, Enyedi L, et al. The flipped-classroom approach to  
448 teaching horizontal strabismus in ophthalmology residency: a multicentered  
449 randomized controlled study. J AAPOS. 2021;25(3):137.e1-137.e6.  
450 [doi:10.1016/j.jaapos.2021.01.008](https://doi.org/10.1016/j.jaapos.2021.01.008)
- 451 [12] Røe Y, Rowe M, Ødegaard NB, Sylliaas H, Dahl-Michelsen T. Learning with  
452 technology in physiotherapy education: design, implementation and evaluation of  
453 a flipped classroom teaching approach. BMC Med Educ. 2019;19(1):291.  
454 [doi:10.1186/s12909-019-1728-2](https://doi.org/10.1186/s12909-019-1728-2)
- 455 [13] Graham KL, Cohen A, Reynolds EE, Huang GC. Effect of a Flipped Classroom  
456 on Knowledge Acquisition and Retention in an Internal Medicine Residency  
457 Program. J Grad Med Educ. 2019;11(1):92-97.  
458 [doi:10.4300/JGME-D-18-00536.1](https://doi.org/10.4300/JGME-D-18-00536.1)

| <b>Table 1</b> Baseline of Internal Medicine Residents Participating in Flipped Teaching |          |
|------------------------------------------------------------------------------------------|----------|
| <b>Indicators</b>                                                                        |          |
| Total number [n,(%)]                                                                     | 19(100)  |
| Sexuality [male,n,(%)]                                                                   | 9(47.4)  |
| Age [years,Mean±standard deviation]                                                      | 29.5±3.1 |
| Education background                                                                     |          |
| Bachelor degree[n,(%)]                                                                   | 5(26.3)  |
| Master degree[n,(%)]                                                                     | 4(21.1)  |
| Doctor degree[n,(%)]                                                                     | 10(52.6) |
| Qualified as a licensed physician [n,(%)]                                                | 17(89.5) |
| Training phase                                                                           |          |
| First year of training[n,(%)]                                                            | 2(10.5)  |
| Second year of training[n,(%)]                                                           | 12(63.2) |
| Third year of training[n,(%)]                                                            | 5(26.3)  |
| From tertiary hospitals [n,(%)]                                                          | 19(100)  |
| Training period for infectious diseases training in the designated hospital as planned   |          |
| March 1 - April 30 [n,(%)]                                                               | 12(63.1) |
| April 1 - May 31 [n,(%)]                                                                 | 7(36.8)  |

| <b>Table 2</b> Flipped Teaching Plan |                      |                                                                                |
|--------------------------------------|----------------------|--------------------------------------------------------------------------------|
| <b>Teaching date</b>                 | <b>Teaching time</b> | <b>content of courses</b>                                                      |
| April 1                              | 13:35-14:20          | Analysis of Chronic Hepatitis B                                                |
| April 1                              | 14:35-15:20          | Study on Guidelines for Prevention and Treatment of Hepatitis C (2019 Edition) |
| April 1                              | 15:35-16:20          | Identification and Treatment of Clostridium Difficile Associated Diarrhea      |
| April 2                              | 13:35-14:20          | Bacterial Liver Abscess                                                        |
| April 2                              | 14:35-15:20          | Diagnosis and Treatment of Tuberculosis                                        |
| April 2                              | 15:35-16:20          | Guidelines for the Diagnosis and Treatment of Syphilis                         |
| April 3                              | 13:35-14:20          | Diagnosis and Treatment of Tuberculous Meningitis                              |
| April 3                              | 14:35-15:20          | Infective Endocarditis                                                         |
| April 3                              | 15:35-16:20          | Cryptococcal Meningitis                                                        |
| April 4                              | 13:35-14:20          | Study on AIDS Diagnosis and Treatment Guide in China (2021 edition)            |
| April 4                              | 14:35-15:20          | Diagnosis and Treatment of Cirrhotic Ascites                                   |
| April 4                              | 15:35-16:20          | Diagnosis and Treatment of liver Failure                                       |

| <b>Table 3</b> Evaluation of Teaching Plan Implementation |           |            |               |
|-----------------------------------------------------------|-----------|------------|---------------|
| <b>Teaching plan indicators</b>                           | <b>CT</b> | <b>NCT</b> | <b>CR (%)</b> |
| Teaching on the planned time                              | 11        | 1          | 91.7          |
| Teaching on the planned content                           | 12        | 0          | 100           |
| Making PPT fully                                          | 12        | 0          | 100           |
| Providing references                                      | 12        | 0          | 100           |
| Unifying the teaching content and training program        | 12        | 0          | 100           |
| Participating in after-class discussion                   | 12        | 0          | 100           |

459 **Abbreviations:** CT, Coincidence times ; NCT, Not-Coincidence times; CR, Coincidence rate.

460 **Note:** Coincidence rate (%) = Coincidence times of teaching indicators / Total times of teaching  
461 indicators \*100%.



| <b>Table 4</b> Attendance of Flipped Teaching |                                |                            |
|-----------------------------------------------|--------------------------------|----------------------------|
| <b>Attendance indicators</b>                  | <b>Residents in attendance</b> | <b>Attendance rates(%)</b> |
| Online on time                                | 18                             | 94.7                       |
| Middle roll call                              | 18                             | 94.7                       |
| End on time                                   | 19                             | 100                        |

462 **Note:** Attendance rate (%) = Number of internal medicine residents in attendance / Total  
463 number of internal medicine residents of this Flipped Teaching for the infectious training \*100%

| <b>Table 5</b> Quality Evaluation of Flipped Teaching  |              |              |              |              |              |
|--------------------------------------------------------|--------------|--------------|--------------|--------------|--------------|
| <b>Teaching quality indicators[n,(%)]</b>              | <b>VP(%)</b> | <b>PR(%)</b> | <b>GN(%)</b> | <b>GD(%)</b> | <b>VG(%)</b> |
| Rigorous teaching attitude                             | 0(0)         | 0(0)         | 1(0.5)       | 26(13.2)     | 170(86.3)    |
| Punctual class                                         | 0(0)         | 0(0)         | 1(0.5)       | 29(14.7)     | 167(84.8)    |
| Detailed and accurate teaching content                 | 0(0)         | 0(0)         | 4(2.0)       | 36(18.3)     | 157(79.7)    |
| Reasonable structure and clear process                 | 0(0)         | 0(0)         | 5(2.5)       | 33(16.8)     | 159(80.7)    |
| Highlighting teaching key points                       | 0(0)         | 0(0)         | 3(1.5)       | 32(16.3)     | 162(82.2)    |
| Clear teaching difficulties                            | 0(0)         | 0(0)         | 7(3.5)       | 33(16.8)     | 157(79.7)    |
| Accurate and refined language                          | 0(0)         | 0(0)         | 5(2.5)       | 31(15.8)     | 161(81.7)    |
| Combining theory with clinical practice                | 0(0)         | 0(0)         | 6(3.0)       | 28(14.3)     | 163(82.7)    |
| Improving ability to analyze and deal with the disease | 0(0)         | 0(0)         | 4(2.0)       | 30(15.3)     | 163(82.7)    |

464 **Abbreviations:** VP, Very poor; PR, Poor; GR, General; GD, Good; VG, Very good.

465 **Note** : 197 feedback of teaching quality evaluation were collected through questionnaires.

| <b>Table 6</b> Overall Evaluation of Flipped Teaching |            |                    |          |            |                     |          |
|-------------------------------------------------------|------------|--------------------|----------|------------|---------------------|----------|
| <b>Evaluation indicators</b>                          | <b>NPE</b> | <b>RPE, CI (%)</b> | <b>P</b> | <b>TTE</b> | <b>RTET, CI (%)</b> | <b>P</b> |
| Improvement suggestions                               | 6          | 31.6(8.6-54.6)     | 0.228    | 18         | 9.1(5.1-13.2)       | <0.001   |
| No special suggestions                                | 10         | 52.6(22.9-77.4)    |          | 69         | 35.0(28.3-41.7)     |          |
| Praise highlights                                     | 11         | 57.9(33.4-82.3)    |          | 110        | 55.8(48.8-62.8)     |          |

466 **Abbreviations:** NPE, Number of participants in evaluation; RPE, Ratio of participants in  
 467 evaluation; TTE, Times of teaching evaluations; RTET, Ratio of teaching evaluation time; CI, 95%  
 468 confidence interval; P, P value.

469 **Note:** Ratio of participants in evaluation (%) = Number of participants in evaluation / Total  
 470 number of participants in the infectious diseases training \*100%

471 Ratio of teaching evaluation times (%) = Teaching evaluation times of each indicator of overall  
 472 evaluation / Total teaching evaluations times of overall evaluation \*100%

473 197 feedback of teaching evaluations on overall evaluation were collected through the  
 474 questionnaires.
